# Supplementary material for: Autocrine selection of a GLP-1R G-protein biased agonist with potent antidiabetic effects
Source: PubMed Central journal article supplement (PMC4686834; doi:10.1038/ncomms9918), 2015-12-01
Supplement: ncomms9918-s1.pdf [file ncomms9918-s1.pdf]

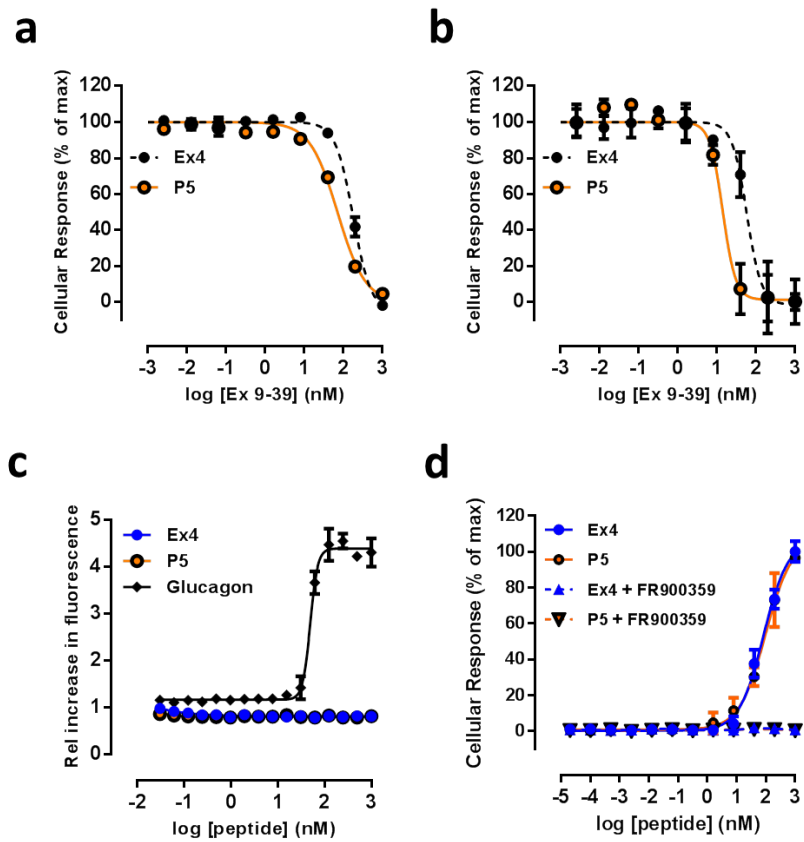

**Supplementary Figure 1** *In vitro* pharmacological characterization of P5 selectivity. **(a, b)** Concentration response curves for Ex 9-39 induced decrease in cAMP production in presence of an EC<sub>90</sub> of P5 in CHO cells expressing the human GLP-1R **(a)** or in HEK293 expressing the mouse GLP-1R **(b)**. **(c)** Concentration response curves for glucagon, P5, and Ex4-induced increase in cAMP production in CHO cells expressing the human glucagon receptor. **(d)** Concentration response curves for P5, and Ex4-induced calcium mobilization in CHO cells expressing the human GLP-1R in the presence or the absence of 1  $\mu$ M of the specific Gq inhibitor FR900359. The data are mean  $\pm$  s.e.m. of a typical experiment that was performed independently three times .

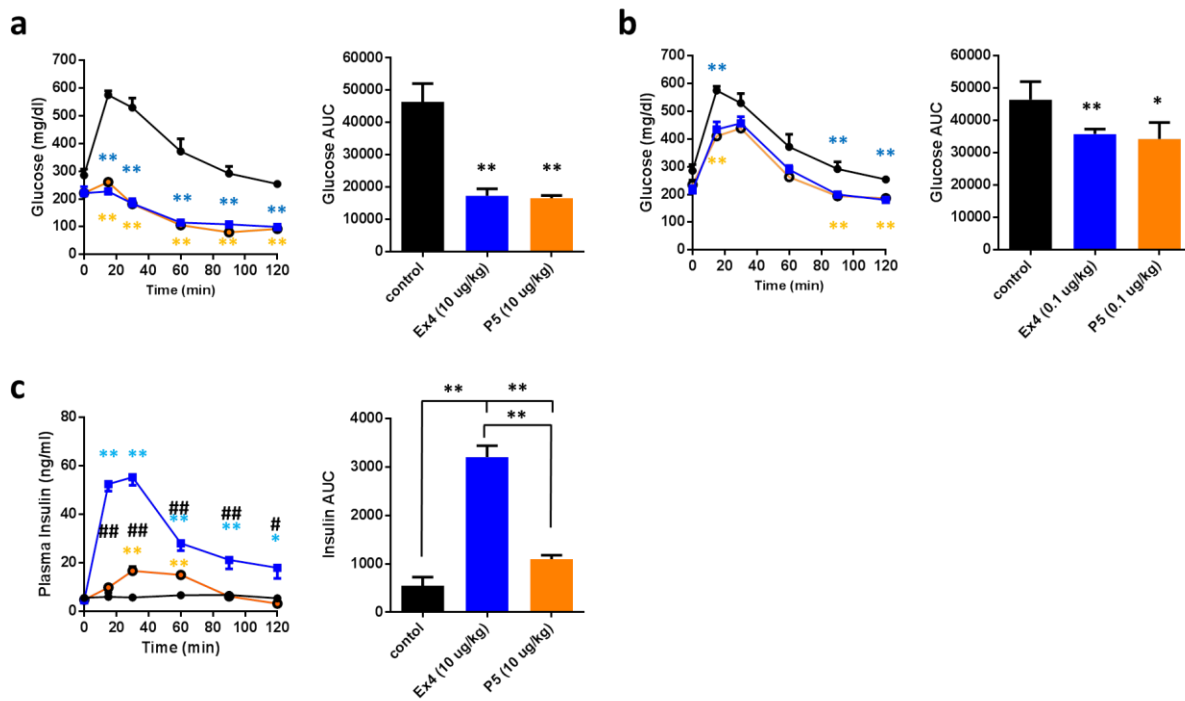

**Supplementary Figure 2** Effect of Acute P5 injection on glycaemia and insulin levels in *ob/ob* mice. (a-c) Effect on intraperitoneal glucose tolerance and plasma insulin levels following a single intraperitoneal co-injection with glucose challenge (n=5) of saline (black), Ex4 (blue) and P5 (orange). Glucose tolerance in *ob/ob* mice treated with 10 µg/kg (a), 0.1 µg/kg (b) (n=5). (c) Plasma insulin level in *ob/ob* mice were analyzed after a single intraperitoneal co-injection of saline (black), 10 µg/kg of Ex4 (blue) or 10 µg/kg of P5 (orange) with glucose challenge (n=5). Data are mean ± s.e.m. Statistic by two-tailed *t*-test: \**P* < 0.05; \*\**P* < 0.01, comparing saline to peptide injection; #*P* < 0.05; ###*P* < 0.01, comparing Ex4 to P5 injection. AUC, area under the curve.

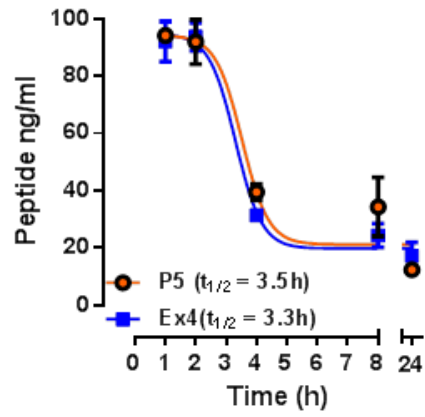

**Supplementary Figure 3** Pharmacokinetic profile and half-life of P5 and Ex4 in mice. Peptides were administered as a single subcutaneous dose at 100 µg/kg. Data are the concentrations of the peptides determined from plasma samples (n=3) by enzyme-linked immunoabsorbent assay. Data are shown as mean ± standard deviation.

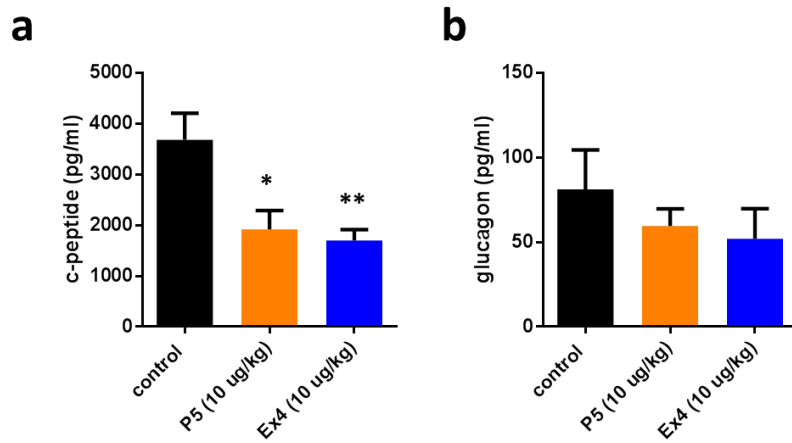

**Supplementary Figure 4** Effect of chronic administration of P5, a G-protein biased agonist on metabolic hormones in DIO mice. Four weeks of treatment of DIO male mice with daily dose of Ex4 or P5 biased agonist. Effects on c-peptide plasma level (**a**) and glucagon plasma level (**b**) after daily subcutaneous injections of saline (black), Ex4 (blue) or P5 (orange) at 10  $\mu\text{g}/\text{kg}$  ( $n=8$ ). Data are mean  $\pm$  s.e.m. Statistic by two-tailed  $t$ -test: \* $P < 0.05$ ; \*\* $P < 0.01$ , comparing saline to peptide injection.

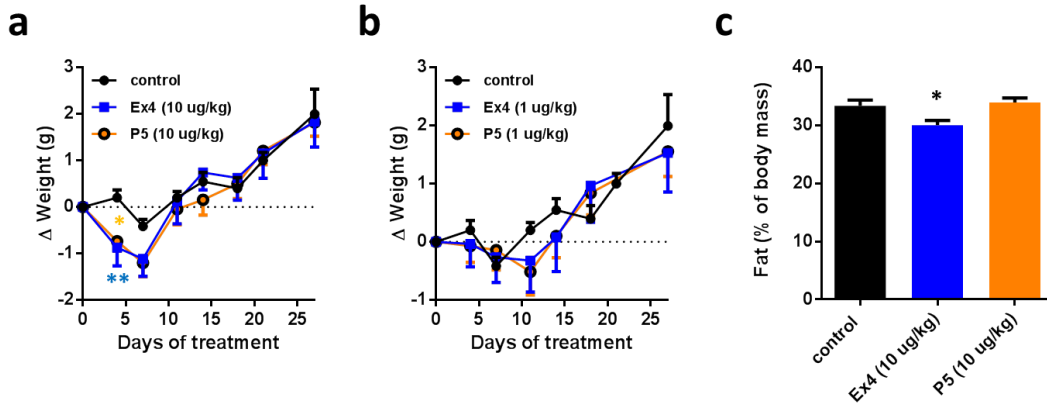

**Supplementary Figure 5** Chronic administration of P5, a G-protein biased agonist improves glycemc status in diabetic mice independently of body weight and fat mass. **(a)** Effect on body weight (n=8) after daily subcutaneous injections of saline (black), Ex4 (blue) and P5 (orange) at 10 μg/kg. **(b)** Effect on body weight (n=8) after daily subcutaneous injections of saline (black), Ex4 (blue) and P5 (orange) at 1 μg/kg. **(c)** MRI analyses of fat (n=8) following daily subcutaneous injections of saline (black), Ex4 (blue) and P5 (orange) at 10 μg/kg. Data are mean ± s.e.m. Statistic by two-tailed *t*-test: \**P* < 0.05; \*\**P* < 0.01, comparing saline to peptide injection.

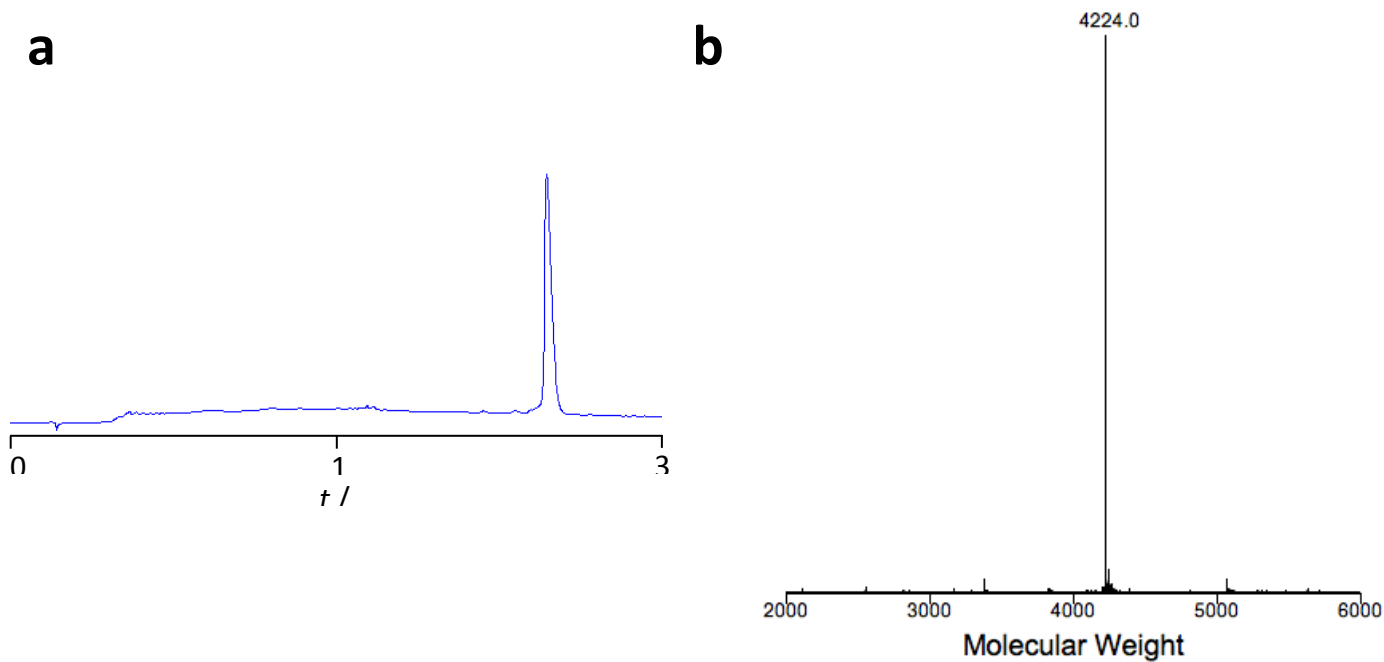

**Supplementary Figure 6 (a)** Analytical reversed-phase (RP) HPLC was carried out on an Agilent 1100 Series HPLC on a Phenomenex Jupiter Proteo column (4  $\mu\text{m}$ , 90  $\text{\AA}$ , 150  $\times$  4.6 mm) at a flow rate of 1 mL/min. Using solvents Buffer A (100%  $\text{H}_2\text{O}$  with 0.05% TFA) and Buffer B (90%:10% ACN:  $\text{H}_2\text{O}$  with 0.05% TFA), a 30 minute gradient of 0% Buffer B to 60% Buffer B was ran. An analytical injection containing 50  $\mu\text{g}$  of purified peptide was monitored at 214 nm to determine a final purity of 97.7% by peak area. **(b)** P5 was characterized using electrospray ionization MS on a LC/MS API 2000 Plus triple quadrupole mass spectrometer (Sciex). Peptide masses were calculated from the experimental mass to charge ( $m/z$ ) ratios from all of the observed protonation states of a peptide by using the onboard analyst software package (Sciex), yielding an observed mass of 4224.0 Da (calculated mass = 4224.6 Da).

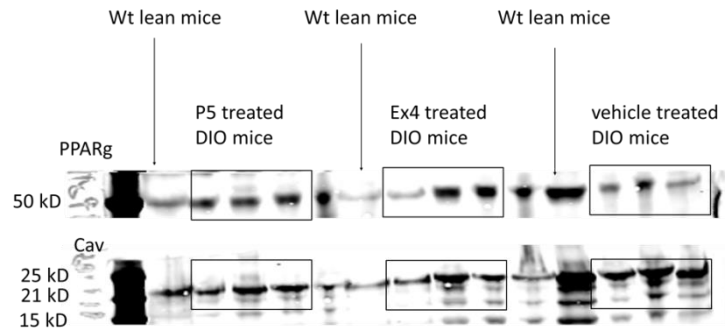

**Supplementary Figure 7** Uncropped Licor images of western blots.

|             | <b>G<math>\alpha</math>s vs <math>\beta</math>-arrestin1</b> | <b>G<math>\alpha</math>s vs <math>\beta</math>-arrestin2</b> | <b>G<math>\alpha</math>q vs <math>\beta</math>-arrestin1</b> | <b>G<math>\alpha</math>q vs <math>\beta</math>-arrestin2</b> |
|-------------|--------------------------------------------------------------|--------------------------------------------------------------|--------------------------------------------------------------|--------------------------------------------------------------|
| <b>GLP1</b> | -0.08 $\pm$ 0.11                                             | -0.04 $\pm$ 0.11                                             | 0.16 $\pm$ 0.13                                              | 0.2 $\pm$ 0.08                                               |
| <b>P5</b>   | 0.9 $\pm$ 0.20                                               | 1.4 $\pm$ 0.27                                               | 1.7 $\pm$ 0.20                                               | 2.4 $\pm$ 0.17                                               |

**Supplementary Table 1** Biased factors for GLP1 and P5. The data are mean  $\pm$  s.d. of a typical experiment that was performed three times.

|                      | <b>Triglycerides</b> | <b>HDL</b>   | <b>LDL</b>   |
|----------------------|----------------------|--------------|--------------|
| <b>Treatment</b>     | <b>mg/dL</b>         | <b>mg/dL</b> | <b>mg/dL</b> |
| <b>control</b>       | 115 $\pm$ 20         | 177 $\pm$ 27 | 29 $\pm$ 7   |
| <b>P5 (10ug/kg)</b>  | 125 $\pm$ 35         | 189 $\pm$ 15 | 21 $\pm$ 3 * |
| <b>Ex4 (10ug/kg)</b> | 120 $\pm$ 34         | 186 $\pm$ 23 | 20 $\pm$ 4*  |
| <b>P5 (1ug/kg)</b>   | 130 $\pm$ 36         | 173 $\pm$ 34 | 26 $\pm$ 10  |
| <b>Ex4 (1ug/kg)</b>  | 113 $\pm$ 18         | 199 $\pm$ 31 | 26 $\pm$ 11  |

**Supplementary Table 2** Metabolic parameters of DIO mice chronically treated with P5. Male DIO mice injected subcutaneously daily with vehicle (control), P5, or Ex4 for 4 weeks (n=8). Data are mean  $\pm$  s.e.m. Statistic by two-tailed *t*-test: \**P* < 0.05, comparing saline to peptide injection.

| <b>Gene</b>   | <b>Forward primer</b> | <b>Reverse primer</b>  |
|---------------|-----------------------|------------------------|
| PPAR $\gamma$ | GCATGGTGCCTTCGCTGA    | TGGCATCTCTGTGTCAACCATG |
| Glut4         | GTGACTGGAACACTGGTCCTA | CCAGCCACGTTGCATTGTAG   |
| CD36          | AAGCTATTGCGACATGATT   | GATCCGACACAGCGTAGAT    |
| TNF $\alpha$  | GACGTGGAAGTGGCAGAAGAG | TGCCACAAGCAGGAATGAGA   |



**Supplementary Table 3** Primer sequences used for qPCR.
